# Supplementary material
Source: publisher figshare collection journal article supplement (https://frontiersin.figshare.com/ndownloader/files/13346615)
Supplement: Supplementary file [file 13346615]

## ***Supplementary Material:***

# **Some pieces are missing: Implicature production in children**

## **1 CONTRASTING *SOME* IN THE CORPUS**

- (1) Contrasting *some* with *all* (Helen, 3;00)

\*MOT: There's all this stuff that I'm trying to sort out and it doesn't help if you're jumping all over them, does it?

CHI: I [\*] not jumping.

CHI: But, but - but - er - I must get out now.

CHI: Some things.

MOT: Pardon ?

CHI: I must get out with...

CHI: ...all my things.

- (2) Contrasting *some* with *all* (Fraser, 3;00)

\*CHI: All finish.

MOT: We've got two that are all finished, haven't we?

CHI: Yeah.

CHI: But those ones, they're missing some pieces.

MOT: They are, aren't they?

CHI: Those ones are missing some pieces.

MOT: Never mind.

- (3) Contrasting *some* with *all* (Gina, 4;03)

\*MOT: So am I allowed to get in this bath with you?

CHI: Yeah!

MOT: Is there room with all those toys in it?

CHI: Well I'll take out - some toys away.

CHI: \*Humming/babbling\*.

CHI: \*Humming/babbling\*.

CHI: Right come on, Mum.

- (4) Contrasting *some* with *nobody* (Helen, 4;05)

\*MOT: Does she?

MOT: But did nobody take you to the teacher?

MOT: Did nobody tell the teacher that you'd fallen over?

CHI: Some - some people did.

MOT: Oh.

MOT: Who took you in?

CHI: I don't know.

- (5) *Some Of* phrase (Helen, 4;05)  
\*CHI: No.  
MOT: Has she been growing in your tummy?  
CHI: Yeah.  
CHI: When some babies when they're growing in their mummy's tummy sometimes some of them get scared.  
MOT: Yeah.  
MOT: \*tuts\*.  
MOT: (Be)cause they've not seen us before.

## 2 THE QUANTIFIER *SOME* IN OTHER LANGUAGES

- (6) English  
I would like some tea, please.
- (7) French  
Je voudrais du/\*certains/\*quelques thé.  
I would like of-the/\*some tea.
- (8) Spanish  
Quisiera un poco de/\*algunos te.  
Want a bit of/\*some tea.
- (9) Italian  
Vorrei un po' di/ \*alcune te.  
Want a bit of/ \*some tea.
- (10) German  
Ich hätte gerne etwas/ \*einige/ \*ein paar Tee.  
I would like a bit/ \*some/ \*a few tea.
- (11) Dutch  
Ik zou graag wat/\*enkele thee hebben.  
I would like a bit/\*some tea have.
- (12) Russian  
Ya khotel by/\*nekotoryy chayu.  
I would like /\*some tea.
- (13) Finnish  
Haluaisin teetä.  
Would like \*some tea.
- (14) Georgian  
minda \*zogiert'i ch'ai.  
want \*some tea.
- (15) Estonian  
Ma tahaksin \*mõnesid/\*natuke teed.  
I would like \*some tea.
